## Examining the effect of smoking on suicidal ideation and attempts: A triangulation of epidemiological approaches

**Authors:** Ruth Harrison<sup>1,2</sup>, Marcus R Munafò<sup>3,4,6,7</sup>, George Davey Smith<sup>4,5</sup>, Robyn E Wootton<sup>3,4,6</sup>.

<sup>1</sup>. Avon & Wiltshire Mental Health Partnership NHS Trust, Bath NHS House Combe Park, Bath BA1 3QE

<sup>2</sup>. Severn Postgraduate Medical Education School of Psychiatry, Health Education England, Park House, 1200 Parkway, Bristol, BS34 8YU

<sup>3</sup>. School of Psychological Science, University of Bristol, 12a Priory Road, Bristol, BS8 1TU

<sup>4</sup>. MRC Integrative Epidemiology Unit, Oakfield House, Oakfield Road, Bristol, BS8 2BN

<sup>5</sup>. Department of Population Health Sciences, Bristol Medical School, University of Bristol, Bristol, BS8 2PR

<sup>6</sup>. NIHR Biomedical Research Centre at the University Hospitals Bristol NHS Foundation Trust and the University of Bristol, (BS8 2BN).

<sup>7</sup>. UK Centre for Tobacco and Alcohol Studies, University of Bristol, Bristol, BS8 1TU

**Word Count:** 3569 out of 4000

## **Abstract (245 out of 250)**

**Background:** Previous literature has demonstrated a strong association between cigarette smoking and suicide-related behaviours, characterised as ideation, plans, attempts and suicide related death. This association has not previously been examined in a causal inference framework and has important implications for suicide prevention strategies.

**Aims:** We aimed to examine the evidence for an association between smoking behaviours (initiation, smoking status, heaviness, lifetime smoking) and suicidal thoughts or attempts by triangulating across observational and Mendelian randomisation (MR) analyses.

**Methods:** First, in the UK Biobank, we calculate observed associations between smoking behaviours and suicidal thoughts or attempts. Second, we used Mendelian randomisation (MR) to explore the relationship between smoking and suicide using genetic variants as instruments to reduce bias from residual confounding and reverse causation.

**Results:** Our observational analysis showed a relationship between smoking behaviour and suicidal behaviour, particularly between smoking initiation and suicidal attempts (OR = 2.07, 95% CI = 1.91 to 2.26,  $p < 0.001$ ). The MR analysis and single SNP analysis, however, did not support this. Despite past literature showing a positive dose-response relationship our results showed no clear evidence for a causal effect of smoking on suicidal behaviours.

**Conclusion:** This was the first MR study to explore the effect of smoking on suicidal behaviours. Our results suggest that, despite observed associations, there is no strong evidence for a causal effect of smoking behaviour on suicidal behaviour. Our evidence suggests that further research is needed into alternative risk factors for suicide which might make better intervention targets.

## Introduction

There are more than 800,000 deaths from suicide each year<sup>1</sup>, and for each death, there are 10-40 unsuccessful attempts<sup>2</sup>. The World Health Organisation (WHO) has recognised this significant public health problem and the need for comprehensive suicide prevention strategies, however at present there is limited evidence of sustained reductions in suicides rates<sup>1</sup>. Studies of the relationship between cigarette smoking and suicide have demonstrated a strong association between current cigarette smoking and suicide-related behaviours characterised as ideation, plans, attempts and suicide related death<sup>3-20</sup>. These associations have been shown to have positive dose-response relationships<sup>7,8,14</sup> that remain after adjustment for potential confounding variables such as psychiatric symptoms<sup>5</sup>, familial risk factors<sup>17</sup>, socio-economic characteristics<sup>6</sup> and alcohol consumption<sup>18</sup>. Smoking interventions such as imposing cigarette taxes and smoke free air policies are reported to be protective against suicide-related outcomes<sup>9</sup>.

A number of psychopathological and physiological hypotheses have been explored to determine whether this association is causal. Even after controlling for specific confounding variables, residual confounding could still be biasing our estimates<sup>6</sup>, for example as a result of social deprivation, lower levels of education and higher levels of impulsivity<sup>8,11</sup>. Another hypothesis is of reverse causation, that smokers with pre-existing mental illness may use nicotine to self-medicate<sup>11</sup>, and in addition, their illness could lead to reduced motivation for smoking cessation. However, there is an alternate possibility, that smoking acts as a causative agent<sup>11</sup>. A number of possible biological pathways have been explored<sup>7</sup>, including evidence that smoking lowers the levels of serotonin<sup>15</sup> and monoamine oxidase A and B<sup>23</sup>. Reduced levels of these neurotransmitters are related to depressive episodes and low levels of serotonin are also linked to increased impulsivity<sup>15</sup>. Nicotine has been found to act as a potent activator of the hypothalamic-pituitary-adrenal (HPA) axis and this has been linked to suicidal behaviour<sup>24</sup>. There is evidence to suggest that chronic cigarette smoking has long-term neurocognitive effects which lead to increased impulsivity and difficulties with decision making due to impairments in cognitive flexibility<sup>7,25</sup>.

A clear understanding of the relationship between smoking and suicide remains to be established. A recent study demonstrated a causal link between smoking and risk of depression using a Mendelian Randomisation (MR) approach<sup>26</sup>. MR can be implemented as a type of instrumental variable analysis in which genetic variants known to be associated with the exposure (smoking) are used as an instrument to test for an effect on the outcome (suicidal ideation and suicide attempts). In this study, we apply MR techniques, using genetic variants identified in genome-wide association studies (GWAS), to the relationship between smoking and suicide. Previous observational research in this area could be biased residual confounding and reverse causation, and MR is one way to overcome these limitations<sup>27</sup>. In our analysis we looked at smoking initiation, smoking heaviness and lifetime smoking, using a genetic instrument that takes into account smoking status, duration, heaviness and cessation<sup>26</sup>.

## **Methods**

### Observational analysis

*Sample.* The UK Biobank is a research resource of health data collected on over 500,000 individuals from study centres located across the United Kingdom. Recruitment occurred between 2006 and 2010. Participants were aged from 39 to 70 years at recruitment (mean = 56.91 years, SD = 7.99 years) and 54% of the sample were female. Overall, 30% of the sample had ever smoked (8% current smokers and 22% former smokers). Further information is available elsewhere (<https://www.ukbiobank.ac.uk/>).

*Measure of suicidal ideation.* In the UK Biobank, participants were asked as part of a questionnaire on depressive symptoms "Over the last 2 weeks, how often have you been bothered by any of the following problems? Thoughts that you would be better off dead or of hurting yourself in some way" (field 20513). Participants could respond depending on frequency of thoughts either "not at all", "several days", "more than half the days" or "nearly every day". We recoded these into a binary variable in which those who responded "not at

all” were coded as 0 and everyone else was coded as 1. Individuals who responded “prefer not to answer” were coded as missing.

*Measure of attempted suicide.* In the UK Biobank, participants were first asked "Have you deliberately harmed yourself, whether or not you meant to end your life?" (field 20480). If they responded yes, then they were asked “Have you harmed yourself with the intention to end your life?” (field 20483). We used both of these measures to derive one binary measure of suicide attempt in which participants were given a score of 0 if they responded negatively to either question and a score of 1 if they responded affirmatively to both questions. Individuals who responded “prefer not to answer” were coded as missing.

*Measure of smoking behaviours.* Participants in the UK Biobank self-reported their smoking status (field 20116). All ever smokers were asked to report their average number of cigarettes per day (fields 3456 and 2887). If participants responded “do not know” or “prefer not to answer” they were coded as missing.

*Statistical analysis.* After restricting to individuals of European ancestry with genetic data available (to make this analysis comparable with subsequent analyses), 337,053 individuals remained. We looked at the effect of four smoking behaviours on suicidal ideation and attempts. These were: smoking status (ever v. never), smoking status (current v. former within ever smokers), cigarettes per day (within ever smokers) and lifetime smoking score. The latter is a combination of smoking duration, smoking cessation and smoking heaviness described in detail elsewhere<sup>26</sup>. The effect of each of these smoking behaviours on suicidal behaviour was estimated using logistic regression, controlling for age, sex and socio-economic position (SEP). All analyses were conducted using R<sup>28</sup>.

#### Mendelian randomisation analysis using summary level data

*Smoking instrument.* This MR approach requires GWAS summary data from two independent samples. The GWAS of suicide attempt was conducted in the UK Biobank, therefore we were unable to use the lifetime smoking instrument because it was also constructed using the UK Biobank<sup>26</sup>. Instead we used the smoking initiation (ever v. never)

GWAS conducted by the GSCAN consortium taking betas from the GWAS with UK Biobank removed<sup>29</sup>. 23andMe had to additionally be removed because they do not allow their full summary data to be released. GSCAN identified 378 conditionally independent genome-wide significant SNPs associated with smoking initiation which explain 4% of the phenotypic variance<sup>29</sup>.

*Suicide GWAS.* The GWAS of suicide attempts was conducted in the UK Biobank using the question and method outlined above with 337,199 participants of which 2,433 were cases<sup>30</sup>. The authors did not identify any genome-wide significant SNPs but the summary statistics can be used as an outcome sample in summary level MR.

*Statistical analysis.* All analysis was conducted using the TwoSampleMR package<sup>31</sup> in R<sup>28</sup>. We used five different MR methods: inverse-variance weighted, MR Egger<sup>32</sup>, weighted median<sup>33</sup>, weighted mode<sup>34</sup> and MR RAPS<sup>35</sup>. Each method makes different assumptions and therefore a consistent effect across multiple methods strengthens causal evidence<sup>36</sup>. If a SNP was unavailable in the outcome GWAS summary statistics, then proxy SNPs were searched for with a minimum LD  $r^2 = 0.8$  and palindromic SNPs were aligned if  $MAF < 0.3$ . We also performed Rucker's Q test of heterogeneity and the MR Egger intercept test to estimate potential directional pleiotropy<sup>32</sup>. Finally, we performed steiger filtering to test for possible reverse causation<sup>37</sup>.

#### Mendelian randomisation analysis using individual level data

*Genotyping.* UK Biobank participants provided blood samples at initial assessment centre. Genotyping was performed using the Affymetrix UK BiLEVE Axiom array for 49,979 participants and using the Affymetrix UK Biobank Axiom® array for 438,398 participants. The two arrays share 95% coverage, but chip is adjusted for in all analyses because the UK BiLEVE sample is over represented for smokers. Imputation and initial quality control steps were performed by the Wellcome Trust Centre for Human Genetics resulting in over 90 million variants<sup>38</sup>.

Individuals were excluded if there were sex-mismatches between reported and chromosomal sex or aneuploidy (N=814). MRC Integrative Epidemiology Unit filtering restricted the sample to individuals of European ancestry based on the first four principal components of population structure<sup>39</sup>. After excluding individuals who had withdrawn consent, 463,033 of the participants remained<sup>39</sup>. We restricted our analysis to autosomes only and used stringent filtering thresholds for SNPs of  $MAF < 0.01$  and  $info > 0.8$ .

*Conducting the GWAS.* Participants from the UK Biobank were randomly allocated to one of two split halves of the genetic data. We then generated lifetime smoking scores in sample 1 of these two samples and ran a GWAS using the UK Biobank pipeline<sup>40</sup> following the exact method as described elsewhere<sup>26</sup>.

*Genetic instrument.* From the GWAS, genome-wide significant variants ( $p < 5 \times 10^{-8}$ ) were clumped for independence at 10000kb and  $r^2 < 0.001$ .

*Instrument validation.* We tested the validity of this instrument by creating a polygenic score from these variants in the second sample from the UK Biobank. This was done using Plink and weighting each allele by the effect size identified in the GWAS of sample 1<sup>41</sup>. This therefore provides an independent replication sample to check how much of the variance is explained in lifetime smoking. If this significantly predicts lifetime smoking in the independent second sample, then this can be used as an instrument in the individual level MR analysis.

*Statistical analysis.* We conducted individual level MR using instrumental variable regressions run in  $R^{28}$  with the `ivreg` command from the AER package. The instrument was the polygenic score from the GWAS in sample 1. We controlled for age, sex, and 10 principal components of population structure in all analyses apart from when we ran the analysis separately in males and females. Then sex was removed as a covariate.

### Single SNP analysis

*Statistical analysis.* Best guess genotypes at the SNP rs1051730 were extracted using Plink<sup>41</sup> in the UK Biobank full sample described above. This SNP in the gene cluster *CHRNA5-A3-B4* is known to be strongly associated with heaviness of smoking<sup>42-45</sup>. We

tested using logistic regression whether the number of effect alleles (A) of this SNP were associated with risk of suicidal ideation and suicide attempts again using the measures described above. We controlled for age and sex in all analyses. The logistic regressions were run in each category of smoking status separately (ever, current, former and never smokers). A causal effect of smoking on suicidal behaviour would be characterised by an effect of rs1051730 in all categories of smoking status apart from never smoking which provides a negative control.

### Sensitivity analysis

*Smoking and impulsivity.* We wanted to ensure that any effects of smoking on suicide attempts were not the result of confounding from personality factors (e.g. impulsivity and risk taking) rather than direct effects of smoking. Therefore, we conducted a follow up analysis using bi-directional MR of smoking initiation on risk taking behaviour using summary level data. As the instrument for smoking initiation we used the 378 SNPs from the GSCAN consortium GWAS and effect sizes with UK Biobank removed<sup>29</sup>. For risk taking behaviour we used the SSGAC GWAS meta-analysed across multiple cohorts of European ancestry<sup>46</sup> which identified 124 SNPs associated with risk tolerance. These analyses followed the method described above for summary level data.

### Ethical approval

UK Biobank has received ethics approval from the UK National Health Service's National Research Ethics Service (ref 11/NW/0382) and this work is part of approved project 9142.

## **Results**

*Observational analysis.* Of the 109,649 individuals who had responded to the question of suicidal ideation, 4,515 (4%) had had suicidal thoughts. Of the 110,035 individuals who had responded to the questions of suicide attempts and self-harm, 2,405



(2%) had ever attempted suicide. Using logistic regression, every smoking behaviour increased odds of suicidal behaviour with the greatest effect being of initiating smoking on odds of attempting suicide (Table 1).

*MR analysis with summary level data.* Of the 378 conditionally independent SNPs associated with smoking initiation identified by the GSCAN consortium<sup>29</sup>, 321 were available in the GWAS summary data for suicide attempt<sup>30</sup>. We first performed the Rucker's Q test of heterogeneity which did not provide evidence for heterogeneity (Supplementary Table S1). MR Egger analysis could not be conducted because the regression dilution  $I^2_{GX}$  was below 0.6 ( $I^2_{GX \text{ unweighted}} = 0.07$ ). All of the other four MR methods showed the same direction of effect with smoking initiation increasing the odds of attempting suicide (Table 2). The strongest evidence was from the IVW and MR RAPS methods. The evidence was weaker for the weighted median and weighted mode approaches which make different assumptions about the nature of pleiotropy. However, the MR Egger intercept and Rucker's Q tests showed no clear evidence of bias from directional pleiotropy (Supplementary Table S2). Steiger filtering estimated that over half of the genetic instruments explained more variance in the outcome than the exposure suggesting that there might be reverse causation (Supplementary Table S3).

*MR analysis using individual level data.* To conduct an MR of lifetime smoking behaviour on risk of suicidal ideation and suicide attempt using individual level data, we first had to conduct a GWAS of suicide attempt in the one-half of the UK Biobank using a random split. We identified 19 independent genome-wide significant SNPs associated with lifetime smoking score. These were then extracted from the second half of the UK Biobank sample (with no sample overlap) and weighted by the effect size to create a polygenic score for each individual. The second half of the UK Biobank sample is 54% female with mean age 56.88 years (SD = 8.00 years). Mean lifetime smoking score in the second half of the sample was 0.342 (SD = 0.679). 4% of individuals had had suicidal thoughts (4% of females and 4% of males) and 2% of individuals had caused themselves harm with the aim to end their life (3% of females and 2% of males). We tested the association of lifetime smoking score and

polygenic risk score on the baseline confounders of sex, age, socio-economic position (SEP), alcohol consumption and educational attainment (Supplementary Table S4). For all confounders, the association was attenuated for the polygenic risk score compared to the observed association.

We validated that the score predicts smoking behaviour by conducting a linear regression of polygenic score on lifetime smoking behaviour in the second half of the UK Biobank. It explained 0.171% ( $p < 0.001$ ) of the variance in lifetime smoking behaviour. Finally, we conducted the individual level MR analysis of lifetime smoking polygenic risk score on suicidal ideation and suicide attempt controlling for age, sex and 10 principal components of population structure (Table 3). There was no clear evidence for an effect of lifetime smoking on suicidal ideation or suicide attempt but a trend towards increased risk in both analyses (Table 3).

*Single SNP analysis.* Finally, we extracted values for the SNP rs1051730 (A/G) from individuals in the UK Biobank. We first confirmed that an increased number of effect alleles (A) were associated with increased smoking behaviour (Supplementary Table S5) where we observed the anticipated increase of ~1 cigarette more per day per allele within ever smokers. We also showed that genotype at rs1051730 is not associated with smoking status or the baseline confounders of sex or alcohol consumption (Supplementary Table S5). However, there was some evidence to suggest that genotype at rs1051730 was associated with educational attainment and age (Supplementary Table S5). There was no clear evidence for an effect of rs1051730 genotype on suicidal behaviours controlling for age and sex (Figure 1). There was weak evidence to suggest that the number of rs1051730 effect alleles might *reduce* risk of suicide attempts with no effect in the never smokers and a small protective effect in the ever smokers (Figure 1). If smoking is increasing risk of suicidal behaviour, we would still expect to see no association in never smokers but the opposite effect within ever smokers.

*Smoking and impulsivity sensitivity analysis.* We only saw evidence for smoking as a risk factor for suicide attempts when the instrument was smoking initiation. One trait

associated with both smoking initiation and suicide attempts is impulsivity. Therefore, we conducted a bi-directional MR of smoking initiation and risk-taking using summary level data which have previously been shown to be genetically correlated<sup>46</sup>. There was strong evidence of a bi-directional causal relationship between smoking initiation and risk-taking behaviour suggesting that the smoking initiation SNPs might be capturing an underlying impulsivity phenotype (Supplementary Table S6) and this could explain why we only observed effects of smoking initiation on suicidal behaviour and not for the other smoking phenotypes. Rucker's Q tests showed some evidence of heterogeneity (Supplementary Table S1) and the MR Egger intercept showed weak evidence of bias by directional pleiotropy (Supplementary Table S2).

## Discussion

The relationship between smoking and suicide-related behaviour is not clearly understood and has important clinical implications<sup>1,2</sup>. In this study, our observational analysis replicated previous observed associations between smoking behaviour and suicidal behaviour, particularly between smoking initiation and suicidal attempts. We went on to explore this association using a Mendelian Randomisation (MR) approach to understand if the association is causal. Overall, the MR analyses, including the single SNP analysis, did not support a causal interpretation. Therefore, despite past literature showing a positive dose-response relationship, our results do not support a causal effect of smoking on suicide.

Our results show evidence of a relationship between smoking initiation and suicidal ideation, but little evidence of an effect of lifetime smoking on suicidal ideation. Taken together with weak evidence for a protective effect in the single SNP analysis, these triangulated results overall suggest that there is only weak evidence for an effect of smoking on increased risk of suicidal behaviours.

### The potential role of impulsivity

The only evidence for smoking as a risk factor was when smoking initiation was the genetic instrument. However, our follow up analyses suggest this could be due to the

instrument capturing underlying impulsivity. Smoking initiation is a complicated instrument with both behavioural and biological components. This behavioural component is likely to be related to impulsivity in part. This is supported by high genetic correlations between the two phenotypes<sup>46</sup>. As there is a known correlation between impulsivity and suicidal behaviours, we were mindful of this association. Therefore, to examine the impact of impulsivity on our results we undertook a bi-directional MR of smoking initiation and risk-taking. We showed strong evidence of a bi-directional causal relationship between smoking initiation and risk-taking behaviour suggesting that our results might be capturing impulsivity and not smoking. This is further supported by the fact that when we are using other instruments of smoking behaviour (e.g. lifetime smoking and smoking heaviness) we did not see any evidence for an effect.

Self-harm is the result of complex interactions of personality factors, including impulsivity, social factors and mental state<sup>47</sup>. It is well established that impulsivity is an important risk factor for suicidal attempts<sup>48</sup>. It has been shown that impulsivity increases with exposure to nicotine, returns to a normal levels with abstinence and increases with re-challenge after abstinence<sup>49,50</sup>. The association with suicidal attempts is not found in former smokers and this therefore supports the link between smoking and impulsivity<sup>7,13,14,51</sup>. This interaction between impulsivity, smoking initiation and suicidal attempts is complex and requires further research.

Recent theoretical models of suicide (i.e. integrated motivational volitional model<sup>52</sup>), all fit with the 'ideation to action' framework which posits that the development of suicidal ideation and progression from ideation to attempts are distinct processes with separate risk factors and explanations<sup>53</sup>. This has clearly important implications in clinical practice and risk management. Few studies have examined smoking within an 'ideation to action' framework. A cross-sectional study found suicide attempters were more likely than ideators to be current smokers<sup>54</sup>. However, in the National Comorbidity Survey, early onset nicotine dependence was prospectively associated with suicide plans but not attempts amongst those with ideation<sup>12</sup>. Our single SNP analysis would support the idea of suicidal ideation and attempts

being separate processes, differentially affected by smoking heaviness and this differentiation is an important area which requires further research.

### Strengths and limitations

This study has many strengths, being the first to our knowledge to use the method of Mendelian randomisation to explore the association between smoking and suicide. We triangulated across multiple methods, multiple smoking behaviours and multiple suicidal behaviours to improve causal inference. However, the power of these analyses was limited by sample size. The single SNP analysis, designed to test the effect of smoking heaviness on suicidal behaviour, included small numbers of those experiencing suicidal thoughts and suicide attempts and was therefore underpowered. However, if anything the trend of association was in the opposite direction to what was hypothesised. It should also be noted that the sample size includes only non-fatal suicide attempts, and therefore our definition of suicide attempts is narrow. We were also limited by the UK Biobank questions asked for suicidal ideation and attempt. Suicidal attempt questions refer to lifetime attempts but suicidal ideation questions refer to symptoms. Another possible limitation is bias from reverse causation. As attempts were unsuccessful, a pathway from attempts to smoking initiation is possible. Furthermore, Steiger filtering estimated that over half of the smoking initiation genetic instruments explained more variance in suicide attempts than smoking initiation.

### Conclusion

This was the first MR study to explore the effect of smoking on suicidal behaviours. Our results suggest that, despite observed associations, when we triangulate across multiple MR methods, there was little evidence for a causal effect of smoking behaviour on suicidal behaviour. It supports recent literature to suggest that suicidal ideation and attempts might need to be thought of as different processes and it has highlighted the complexity of unpicking the behavioural from biological components of smoking behaviours. Our evidence suggests that further research is needed into alternative risk factors for suicide which might make better intervention targets.

### **Declaration of interests**

No conflicts of interest to declare.

### **Acknowledgments**

We are grateful to the participants of the UK Biobank and the individuals who contributed to each of the previous GWAS analyses conducted as well as all the research staff who worked on the data collection. This paper has used UK Biobank Application number 9142.

### **Funding sources**

REW, GDS and MRM are all members of the MRC Integrative Epidemiology Unit at the University of Bristol funded by the MRC: <http://www.mrc.ac.uk> [MC\_UU\_00011/1, MC\_UU\_00011/7]. This study was supported by the NIHR Biomedical Research Centre at the University Hospitals Bristol NHS Foundation Trust and the University of Bristol. The views expressed in this publication are those of the authors and not necessarily those of the NHS, the National Institute for Health Research or the Department of Health and Social Care.

### **Author Contributions**

GDS and MRM conceived the study. REW conducted the analysis. RH reviewed the literature and provided clinical expertise. REW and RH drafted the initial manuscript. GDS and MRM advised and guided all stages of analysis. All authors assisted with interpretation, commented on drafts of the manuscript, and approved the final version. REW is the guarantor and attests that all listed authors meet authorship criteria and that no others meeting the criteria have been omitted.

## References

1. World Health Organisation. Preventing suicide: A global imperative. 2014.
2. Miller M, Azrael D, Barber C. Suicide mortality in the United States: The importance of attending to method in understanding population-level disparities in the burden of suicide. *Annu Rev Public Health*. 2012;33:393–408.
3. Balbuena L, Tempier R. Independent Association of Chronic Smoking and Abstinence with Suicide. *Psychiatr Serv*. 2015;66(2):186-192.
4. Bohnert KM, Ilgen MA, McCarthy JF, Ignacio RV, Blow FC, Katz IR. Tobacco use disorder and the risk of suicide mortality. *Addict Abingdon Engl*. 2014;109(1):155-162. doi:10.1111/add.12381
5. Bronisch T, Höfler M, Lieb R. Smoking predicts suicidality: Findings from a prospective community study. *J Affect Disord*. 2008;108(1-2):135–145.
6. Davey Smith G, Phillips AN, Neaton JD. Smoking as "independent" risk factor for suicide: Illustration of an artifact from observational epidemiology? *The Lancet*. 1992;340(8821):709–712.
7. Evins A, Korhonen T, Kinnunen T. Prospective association between tobacco smoking and death by suicide: A competing risks hazard analysis in a large twin cohort with 35-year follow-up. *Psychol Med*. 2017;(47):2143-2154.
8. Green M, Turner S, Sareen J. *Smoking and Suicide: Biological and Social Evidence and Causal Mechanisms*. BMJ Publishing Group Ltd; 2017.
9. Grucza RA, Plunk AD, Krauss MJ, et al. Probing the Smoking–Suicide Association: Do Smoking Policy Interventions Affect Suicide Risk? *Nicotine Tob Res*. 2014;16(11):1487-1494. doi:10.1093/ntr/ntu106
10. Han B, Compton WM, Blanco C. Tobacco Use and 12-Month Suicidality Among Adults in the United States. *Nicotine Tob Res*. 2017;19(1):39-48. doi:10.1093/ntr/ntw136
11. Hughes JR. Smoking and Suicide: A Brief Overview. *Drug Alcohol Depend*. 2008;98(3):169-178.
12. Kessler RC, Borges G, Miller M, et al. The association between smoking and subsequent suicide-related outcomes in the National Comorbidity Survey panel sample. *Mol Psychiatry*. 2009;(14):1132-1142.
13. Li D, Yang X, Ge Z. Cigarette smoking and risk of completed suicide: A meta-analysis of prospective cohort studies. *J Psychiatry Res*. 2012;(46):1257-1266.
14. Lucas M, O'Reilly EJ, Mirzaei F, et al. Cigarette smoking and completed suicide: Results from 3 prospective cohorts of American adults. *J Affect Disord*. 2013;151(3):1053-1058. doi:10.1016/j.jad.2013.08.033
15. Malone KM, Waternaux C, Haas GL, Cooper TB, Li S, Mann JJ. Cigarette smoking, suicidal behavior, and serotonin function in major psychiatric disorders. *Am J Psychiatry*. 2003;160(4):773–779.
16. Poorolajal J, Darvishi N. Smoking and Suicide: A Meta-Analysis. *PLOS ONE*. 2016;11(7):e0156348. doi:10.1371/journal.pone.0156348
17. Scherrer J, Grant J, Agrawal A. Suicidal behaviour, smoking and familial vulnerability. *Nicotine Tob Res*. 2012;14(4):415-424.
18. Schneider B, Baumert J, Schneider A, et al. The effect of risky alcohol use and smoking on suicide risk: Findings from the German MONICA/KORA-Augsburg Cohort Study. *Soc Psychiatry Psychiatr Epidemiol*. 2011;46(11):1127-1132. doi:10.1007/s00127-010-0287-y
19. Shah A. A replication of a possible relationship between elderly suicide rates and smoking using five-year data on suicide rates? A cross-national study. *J Inj Violence Res*. 2010;2(1):35-40. doi:10.5249/jivr.v2i1.44
20. Yaworski D, Robinson J, Sareen J, Bolton JM. The relation between nicotine dependence and suicide attempts in the general population. *Can J Psychiatry Rev Can Psychiatr*. 2011;56(3):161-170. doi:10.1177/070674371105600306

21. Lim KX, Rijsdijk F, Hagenaars SP, et al. Identifying Potential Causal Risk Factors for Self-Harm: A Polygenic Risk Scoring and Mendelian Randomisation Approach. *BioRxiv*. 2019:673053.
22. Fang F, Fall K, Mittleman MA, et al. Suicide and Cardiovascular Death after a Cancer Diagnosis. *N Engl J Med*. 2012;366(14):1310-1318. doi:10.1056/NEJMoa1110307
23. Hughes JR. Effects of abstinence from tobacco: Valid symptoms and time course. *Nicotine Tob Res*. 2007;9(3):315–327.
24. Mann JJ, Currier D, Stanley B, Oquendo MA, Amsel LV, Ellis SP. Can biological tests assist prediction of suicide in mood disorders? *Int J Neuropsychopharmacol*. 2006;9(4):465–474.
25. Sankaranarayanan A, Mancuso S, Wilding H, Ghuloum S, Castle D. Smoking, Suicidality and Psychosis: A Systematic Meta-Analysis. *PLoS One*. 2015;10(9):e0138147. doi:10.1371/journal.pone.0138147
26. Wootton RE, Richmond RC, Stuijzand BG, et al. Causal effects of lifetime smoking on risk for depression and schizophrenia: Evidence from a Mendelian randomisation study. *BioRxiv*. 2018:381301.
27. Davey Smith G, Ebrahim S. “Mendelian randomization”: Can genetic epidemiology contribute to understanding environmental determinants of disease? *Int J Epidemiol*. 2003;32(1):1-22.
28. R Core Team. *R: A Language and Environment for Statistical Computing*. R Foundation for Statistical Computing, Vienna, Austria. 2013. ISBN 3-900051-07-0; 2014.
29. Liu M, Jiang Y, Wedow R, et al. Association studies of up to 1.2 million individuals yield new insights into the genetic etiology of tobacco and alcohol use. *Nat Genet*. 2019:1.
30. Ruderfer DM, Walsh CG, Aguirre MW, et al. Significant shared heritability underlies suicide attempt and clinically predicted probability of attempting suicide. *BioRxiv*. February 2018:266411. doi:10.1101/266411
31. Hemani G, Zheng J, Elsworth B, et al. The MR-Base platform supports systematic causal inference across the human phenome. *ELife*. 2018;7:e34408.
32. Bowden J, Davey Smith G, Burgess S. Mendelian randomization with invalid instruments: Effect estimation and bias detection through Egger regression. *Int J Epidemiol*. 2015;44(2):512–525.
33. Bowden J, Davey Smith G, Haycock PC, Burgess S. Consistent estimation in Mendelian randomization with some invalid instruments using a weighted median estimator. *Genet Epidemiol*. 2016;40(4):304–314.
34. Hartwig FP, Smith GD, Bowden J. Robust inference in two-sample Mendelian randomisation via the zero modal pleiotropy assumption. *BioRxiv*. 2017:126102.
35. Zhao Q, Wang J, Hemani G, Bowden J, Small DS. Statistical inference in two-sample summary-data Mendelian randomization using robust adjusted profile score. *ArXiv*. January 2018. <http://arxiv.org/abs/1801.09652>. Accessed June 26, 2018.
36. Lawlor DA, Tilling K, Davey Smith G. Triangulation in aetiological epidemiology. *Int J Epidemiol*. 2016;45(6):1866–1886.
37. Hemani G, Tilling K, Davey Smith G. Orienting the causal relationship between imprecisely measured traits using GWAS summary data. Li J, ed. *PLoS Genet*. 2017;13(11):e1007081. doi:10.1371/journal.pgen.1007081
38. Bycroft C, Freeman C, Petkova D, et al. Genome-wide genetic data on ~500,000 UK Biobank participants. *BioRxiv*. July 2017:166298. doi:10.1101/166298
39. Mitchell R, Hemani G, Dudding T, Paternoster L. UK Biobank Genetic Data: MRC-IEU Quality Control, Version 1. Data.bris. doi:10.5523/bris.3074krb6t2frj29yh2b03x3wxj
40. Elsworth BL, Mitchell R, Raistrick CA, Paternoster L, Hemani G, Gaunt T. MRC IEU UK Biobank GWAS pipeline version 1. Data.bris. doi:10.5523/bris.2fahpksont1zi26xosyamqo8rr
41. Purcell S, Neale B, Todd-Brown K, et al. PLINK: A tool set for whole-genome association and population-based linkage analyses. *Am J Hum Genet*. 2007;81(3):559–575.



42. Munafò MR, Timofeeva MN, Morris RW, et al. Association Between Genetic Variants on Chromosome 15q25 Locus and Objective Measures of Tobacco Exposure. *JNCI J Natl Cancer Inst.* 2012;104(10):740-748. doi:10.1093/jnci/djs191
43. Thorgeirsson TE, Geller F, Sulem P, et al. A Variant Associated with Nicotine Dependence, Lung Cancer and Peripheral Arterial Disease. *Nature.* 2008;452(7187):638-642. doi:10.1038/nature06846
44. Tobacco Consortium. Genome-wide meta-analyses identify multiple loci associated with smoking behavior. *Nat Genet.* 2010;42(5):441-447.
45. Ware JJ, van den Bree MB, Munafò MR. Association of the CHR5-A3-B4 gene cluster with heaviness of smoking: A meta-analysis. *Nicotine Tob Res.* 2011;13(12):1167-1175.
46. Linnér RK, Biroli P, Kong E, et al. Genome-wide association analyses of risk tolerance and risky behaviors in over 1 million individuals identify hundreds of loci and shared genetic influences. *Nat Genet.* 2019;51(2):245. doi:10.1038/s41588-018-0309-3
47. de Cates AN, Catone G, Bebbington P, Broome MR. Attempting to disentangle the relationship between impulsivity and longitudinal self-harm: Epidemiological analysis of UK household survey data. *Int J Soc Psychiatry.* 2019;65(2):114-122. doi:10.1177/0020764019827986
48. Septier M, Stordeur C, Zhang J, Delorme R, Cortese S. Association between suicidal spectrum behaviors and Attention-Deficit/Hyperactivity Disorder: A systematic review and meta-analysis. *Neurosci Biobehav Rev.* 2019.
49. Kayir H, Semenova S, Markou A. Baseline impulsive choice predicts the effects of nicotine and nicotine withdrawal on impulsivity in rats. *Prog Neuropsychopharmacol Biol Psychiatry.* 2014;48:6-13.
50. Kolokotroni KZ, Rodgers RJ, Harrison AA. Trait differences in response to chronic nicotine and nicotine withdrawal in rats. *Psychopharmacology (Berl).* 2014;231(3):567-580. doi:10.1007/s00213-013-3270-y
51. Iwasaki M, Akechi T, Uchitomi Y, Tsugane S, Japan Public Health Center-based Prospective Study on Cancer and Cardiovascular Disease (JPHC study) Group. Cigarette smoking and completed suicide among middle-aged men: A population-based cohort study in Japan. *Ann Epidemiol.* 2005;15(4):286-292. doi:10.1016/j.annepidem.2004.08.011
52. O'Connor R. Towards an Integrated Motivational-Volitional Model of suicidal behaviour. In: *International Handbook of Suicide Prevention: Research, Policy and Practice.* Chichester, UK: Wiley-Blackwell; 2011:181-198.
53. Mars B, Heron J, Klonsky D, et al. What distinguishes adolescents with suicidal thoughts from those who have attempted suicide? A population-based birth cohort study. *J Child Psychol Psychiatry.* 2018.
54. King R, Schwab-Stone M, Flisher A, et al. Psychosocial and risk behaviour correlates of youth suicide attempts and suicidal ideation. *J Am Acad Child Adolesc Psychiatry.* 2001;40(7):837-846.

## Tables and figures

**Table 1. The observed association of smoking behaviour on suicidal ideation and suicide attempts controlling for age, sex and socio-economic position**

| Smoking            | Suicidal Ideation |                   |         | Suicide attempt |                   |         |
|--------------------|-------------------|-------------------|---------|-----------------|-------------------|---------|
|                    | N                 | OR (95% CI)       | P-value | N               | OR (95% CI)       | P-value |
| Ever v. Never      | 109,301           | 1.39 (1.31, 1.48) | <0.001  | 109,688         | 2.07 (1.91, 2.26) | <0.001  |
| Current v. Former  | 45,825            | 1.54 (1.39, 1.70) | <0.001  | 46,011          | 1.54 (1.36, 1.75) | <0.001  |
| Cigarettes per day | 29,230            | 1.02 (1.01, 1.02) | <0.001  | 29,342          | 1.02 (1.02, 1.03) | <0.001  |
| Lifetime smoking   | 109,301           | 1.42 (1.36, 1.48) | <0.001  | 109,688         | 1.80 (1.71, 1.89) | <0.001  |

**Table 2. Mendelian randomisation analyses using summary level data of smoking initiation on risk of suicide attempt.**

| Method                    | N SNP | OR (95% CI)        | P-value |
|---------------------------|-------|--------------------|---------|
| Inverse-Variance Weighted | 321   | 2.42 (1.53, 3.83)  | <0.001  |
| Weighted Median           | 321   | 1.73 (0.85, 3.50)  | 0.13    |
| Weighted Mode             | 321   | 1.93 (0.24, 15.28) | 0.53    |
| MR RAPS                   | 321   | 2.86 (1.64, 4.98)  | <0.001  |

**Table 3. MR analysis of lifetime smoking on suicidal ideation and attempt using individual level data**

|                | Suicidal Ideation |                       |         | Suicide attempt |                       |         |
|----------------|-------------------|-----------------------|---------|-----------------|-----------------------|---------|
|                | N                 | Beta (95% CI)         | P-value | N               | Beta (95% CI)         | P-value |
| <b>All</b>     | 54,289            | 0.050 (-0.027, 0.127) | 0.21    | 54,500          | 0.053 (-0.003, 0.110) | 0.06    |
| <b>Females</b> | 30,480            | 0.069 (-0.047, 0.185) | 0.24    | 30,590          | 0.046 (-0.047, 0.140) | 0.33    |
| <b>Males</b>   | 23,797            | 0.028 (-0.073, 0.130) | 0.59    | 23,898          | 0.060 (-0.004, 0.124) | 0.07    |

**Figure 1. Logistic regression results of genotype at rs1051730 on odds of suicidal ideation and suicide attempt by smoking status.**

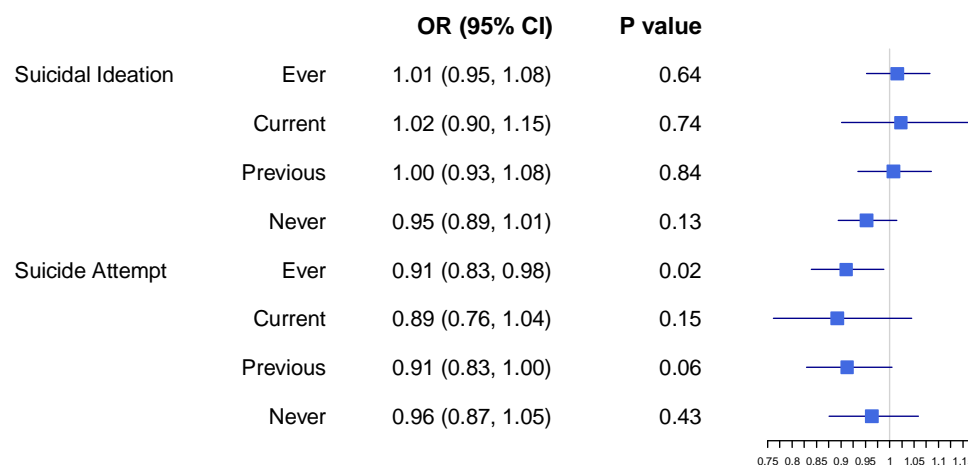

Source: https://medrxiv.org/content/medrxiv/early/2019/10/25/19007013.full.pdf
